# Supplementary material for: A Review and Tutorial of Machine Learning Methods for Microbiome Host Trait Prediction
Source: Front Genet. 2019 Jun 25;10:579. doi: 10.3389/fgene.2019.00579 (PMC6603228; doi:10.3389/fgene.2019.00579)
Supplement: Supplementary Table 1 — Full table of published prediction accuracies. [file Table_1.XLSX]

## Sheet: Sheet1
Paper	Dataset	Trait	Samples	Cases	Controls	Taxa	Level	Method	Metric	Value
Duvallet, 2017	Singh, 2015	Diarrhea	283	201	82	122	genus	random forest	AUC	0.96
	Schubert, 2014	Diarrhea	247	93	154	113	genus	random forest	AUC	0.99
	Schubert, 2014	Diarrhea	243	89	154	112	genus	random forest	AUC	0.98
	Vincent, 2013	Diarrhea	50	25	25	98	genus	random forest	AUC	0.91
	Goodrich, 2014	Obesity	613	185	428	153	genus	random forest	AUC	0.67
	Turnbaugh, 2009	Obesity	256	195	61	80	genus	random forest	AUC	0.84
	Zupancic, 2012	Obesity	197	101	96	44	genus	random forest	AUC	0.44
	Ross, 2015	Obesity	63	37	26	92	genus	random forest	AUC	0.49
	Zhu, 2013	Obesity	41	25	16	97	genus	random forest	AUC	0.93
	Baxter, 2016	Colorectal cancer	292	120	172	153	genus	random forest	AUC	0.77
	Zeller, 2014	Colorectal cancer	116	41	75	186	genus	random forest	AUC	0.82
	Wang, 2012	Colorectal cancer	98	44	54	44	genus	random forest	AUC	0.9
	Chen, 2012	Colorectal cancer	43	21	22	66	genus	random forest	AUC	0.78
	Gevers, 2014	IBD	162	146	16	135	genus	random forest	AUC	0.71
	Morgan, 2012	IBD	126	108	18	71	genus	random forest	AUC	0.81
	Papa, 2012	IBD	90	66	24	76	genus	random forest	AUC	0.84
	Willing, 2010	IBD	80	45	35	62	genus	random forest	AUC	0.66
	Noguera-Julian, 2016	HIV	239	205	34	139	genus	random forest	AUC	0.67
	Dinh, 2015	HIV	36	21	15	57	genus	random forest	AUC	0.22
	Lozupone, 2013	HIV	36	23	13	104	genus	random forest	AUC	0.92
	Son, 2015	Autism spectrum disorder	103	59	44	71	genus	random forest	AUC	0.39
	Kang, 2013	Autism spectrum disorder	39	19	20	56	genus	random forest	AUC	0.76
	Alkanani, 2015	Type I diabetes	112	57	55	62	genus	random forest	AUC	0.71
	Mejia-Leon, 2014	Type I diabetes	29	21	8	66	genus	random forest	AUC	0.77
	Wong, 2013	Non-alcoholic steatohepatitis	38	16	22	35	genus	random forest	AUC	0.68
	Zhu, 2013	Non-alcoholic steatohepatitis	38	22	16	92	genus	random forest	AUC	0.86
	Scher, 2013	Arthritis	114	86	28	70	genus	random forest	AUC	0.62
	Zhang, 2013	Liver diseases	71	46	25	55	genus	random forest	AUC	0.8
	Scheperjans, 2015	Parkinson’s disease	148	74	74	75	genus	random forest	AUC	0.67
Pasolli, 2016	Qin, 2014	Liver cirrhosis	232	118	114	542	species	random forest	AUC	0.945
								svm	AUC	0.922
								elastic net	AUC	0.913
								lasso	AUC	0.877
	Zeller, 2014	Colorectal cancer	121	48	73	503	species	random forest	AUC	0.873
								svm	AUC	0.809
								elastic net	AUC	0.793
								lasso	AUC	0.732
	Qin, 2010	IBD	110	25	85	443	species	random forest	AUC	0.89
								svm	AUC	0.862
								elastic net	AUC	0.832
								lasso	AUC	0.81
	Le Chatelier, 2013	Obesity	253	164	89	465	species	random forest	AUC	0.655
								svm	AUC	0.648
								elastic net	AUC	0.642
								lasso	AUC	0.598
	Qin, 2012	Type II diabetes	344	170	174	572	species	random forest	AUC	0.744
								svm	AUC	0.663
								elastic net	AUC	0.699
								lasso	AUC	0.706
	Karlsson, 2013	Type II diabetes	96	53	43	381	species	random forest	AUC	0.762
								svm	AUC	0.664
								elastic net	AUC	0.599
								lasso	AUC	0.536
Zeevi, 2015		Personalized postprandial glycemic response (PPGR)	800	NA	NA	72	species	gradient boosting	R	0.68
Johnson, 2016		Postmortem interval (PMI)	67	NA	NA	52	phylum	ridge	Error rate	0.4623
						52	phylum	elastic net	Error rate	0.4782
						3130	species	lasso	Error rate	0.4931
						52	phylum	svm	Error rate	0.498
						3130	species	ridge	Error rate	0.5114
						3130	species	elastic net	Error rate	0.5163
						52	phylum	lasso	Error rate	0.5171
Ning, 2015		Nine oral sites	2702	NA	NA	7048	various	svm	Accuracy	0.762
Montassier, 2016		Bloodstream infection (BSI)	28	11	17	13	genus	random forest	AUC	0.94
Ditzler, 2015	Rousk, 2010	Soil pH (low/medium/high)	22	NA	NA	500	various	recursive neural network (RNN) (50)	Error rate	0.15
								deep belief network (DBN) (500)	Error rate	0.075
								deep belief network (DBN) (750)	Error rate	0.075
								random forest	Error rate	0.15
								multi-layer perceptron neural network (MLPNN) (500)	Error rate	0
	Caporaso, 2011	Host gender	1967	NA	NA	500	various	recursive neural network (RNN) (250)	Error rate	0.1474
								recursive neural network (RNN) (500)	Error rate	0.1915
								deep belief network (DBN) (250)	Error rate	0.2442
								deep belief network (DBN) (500)	Error rate	0.2421
								random forest	Error rate	0.0284
								multi-layer perceptron neural network (MLPNN) (500)	Error rate	0.0806
	Caporaso, 2011	Three body sites	1967	NA	NA	500	various	recursive neural network (RNN) (250)	Error rate	0.1687
								recursive neural network (RNN) (500)	Error rate	0.1581
								deep belief network (DBN) (250)	Error rate	0.0315
								deep belief network (DBN) (500)	Error rate	0.0279
								random forest	Error rate	0.0086
								multi-layer perceptron neural network (MLPNN) (500)	Error rate	0.0056
Thaiss, 2016		Obesity history	50	25	25	189	various	random forest	AUC	0.96
		Post-dieting weight regain	50	NA	NA	189	various	gradient boosting	R	0.72
Liu, 2011	Costello, 2009	Six body sites	815	NA	NA	11	genus	k-nearest neighbor + svm (MetaDistance)	Accuracy	0.941
Chang, 2017		Crop productivity from soil samples (high/low)	12	6	6	134	order	random forest	Accuracy	0.79
Reiman, 2017	Caporaso, 2011	Three body sites	1967	NA	NA	1706	various	recursive neural network (RNN) (250)	Accuracy	0.8313
								recursive neural network (RNN) (500)	Accuracy	0.8419
								deep belief network (DBN) (250)	Accuracy	0.9685
								deep belief network (DBN) (500)	Accuracy	0.9721
								multi-layer perceptron neural network (MLPNN) (500)	Accuracy	0.9944
								random forest	Accuracy	0.9914
								convolutional neural network (CNN-1D)	Accuracy	0.9467
								convolutional neural network (CNN-2D)	Accuracy	0.9947
Moitinho-Silva, 2017		Microbial abundance from sponges (high/low)	1232	NA	NA	30	phylum	random forest	Accuracy	0.969
								adaptive boosting (AdaBoost)	Accuracy	0.9467
						76	class	random forest	Accuracy	0.9475
								adaptive boosting (AdaBoost)	Accuracy	0.9111
						2322	various	random forest	Accuracy	0.5
								adaptive boosting (AdaBoost)	Accuracy	0.9135
Ai, 2017		Colorectal cancer (CRC)	141	42	99	1171	species	Bayes net	AUC	0.93
								random forest	AUC	0.94
								logistic	AUC	0.975
			141	53	88	783	species	Bayes net	AUC	0.858
								random forest	AUC	0.86
								logistic	AUC	0.714
Wu, 2018		Three diseases	806	423	383	300	genus	logistic	F1	0.9142
								k-nearest neighbor	F1	0.8602
								random forest	F1	0.8341
								svm	F1	0.9138
								gradient boosting	F1	0.8741
								adaptive boosting	F1	0.8959
Walker, 2018		Three sample locations	929	NA	NA	19	order	random forest	Error rate	0.0301
						23	family	random forest	Error rate	0.0312
						10	genus	random forest	Error rate	0.0677
Nakano, 2018		Oral malodour	90	45	45	37	genus	svm	Accuracy	0.789
								deep learning	Accuracy	0.967
Doherty, 2018		Response to treatment	306	232	74	NA	various	random forest	AUC	0.844
Asgari, 2018	HMP	Five body sites	1192	NA	NA	20589	various	random forest	F1	0.89
								svm	F1	0.85
	Gevers, 2014	Crohn's disease	1359	731	628	9511	various	random forest	F1	0.74
								svm	F1	0.68
